# Supplementary material for: The Extent and Diverse Trajectories of Longitudinal Changes in Rheumatoid Arthritis Interstitial Lung Diseases Using Quantitative HRCT Scores
Source: MDPI journal article supplement (doi:10.3390/jcm10173812), 2021-08-25
Supplement: s1 [file s1]

# Supplementary Figure S1

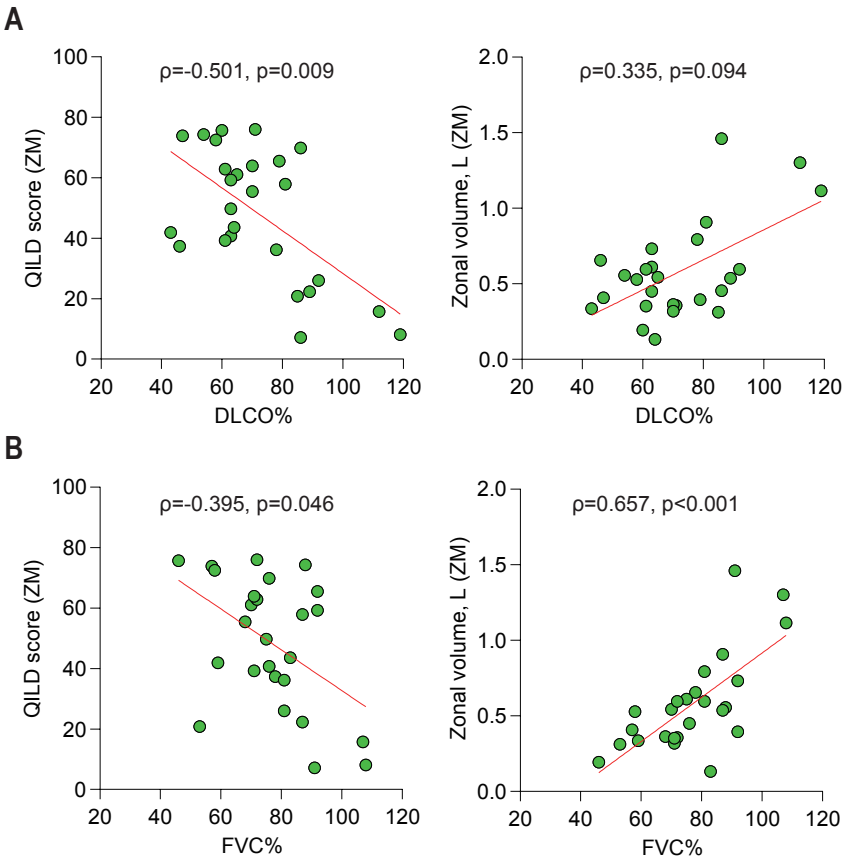

Supplementary Figure S2

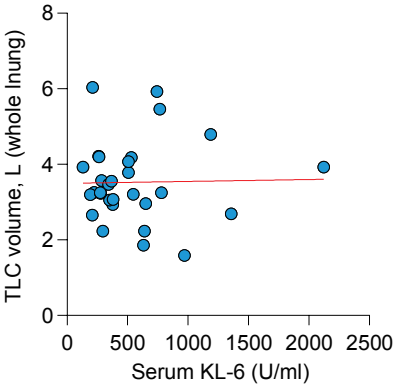

Supplementary Figure S3

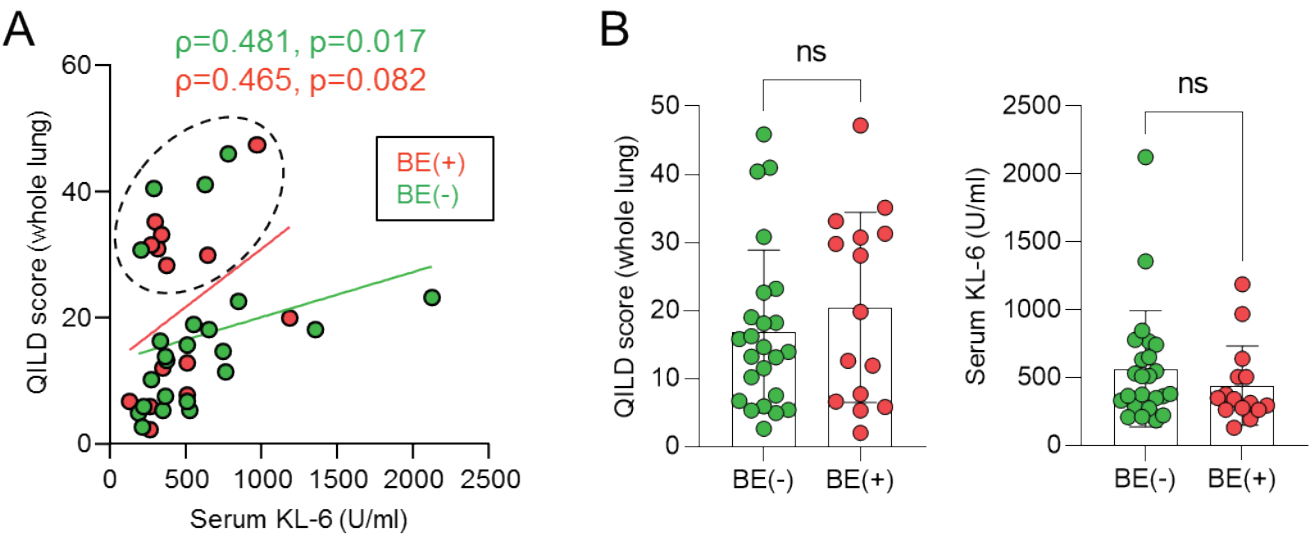

## Supplementary Figure S4

Patient 5  
27 month  
Acute exacerbated

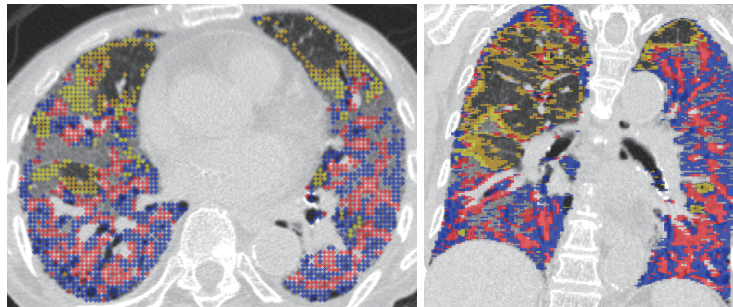

QILD 56.3, TLC 2.0

**Supplementary table S1.** Correlation between QILD score change (visit 0-1) and the evaluation of radiologists on interval change of ILD severity.

| Area | Progression criteria | Evaluation by radiologist |                |                           |
|------|----------------------|---------------------------|----------------|---------------------------|
|      |                      | Interval progression      | Stable disease | P-value (X <sup>2</sup> ) |
| WL   | QILD increase ≥1     | 11                        | 19             | 0.0438                    |
|      | <1                   | 4                         | 26             |                           |
|      | QILD increase ≥3     | 10                        | 12             | 0.0080                    |
|      | <3                   | 5                         | 33             |                           |
|      | QILD increase ≥5     | 8                         | 6              | 0.0031                    |
|      | <5                   | 7                         | 39             |                           |
| ZM   | QILD increase ≥1     | 11                        | 20             | 0.0600                    |
|      | <1                   | 4                         | 25             |                           |
|      | QILD increase ≥3     | 10                        | 14             | 0.0192                    |
|      | <3                   | 5                         | 31             |                           |
|      | QILD increase ≥5     | 10                        | 12             | 0.0080                    |
|      | <5                   | 5                         | 33             |                           |

ZM, zone of maximal involvement; WL, whole lung.
